# Supplementary material
Source: ML conference proceedings conference paper supplement (https://openreview.net/forum?id=TD3SGJfBC7)
Supplement: supplementary_material [file attachment]

## Sheet: Sheet1
Selected prompt templates for iWildCam	Selected prompt templates for DomainNet	Selected prompt templates for FMOW	Selected prompt templates for Camelyon17
a blurry photo of the {}.	a blurry photo of a {}.	aerial photo of a {} in oceania.	a dark photo of the {}.
a dark photo of the {}.	a embroidered {}.	{}.	a black and white photo of the {}.
a cropped photo of the {}.	itap of the {}.		a good photo of the {}.
a black and white photo of the {}.	itap of my {}.
a black and white photo of a {}.	itap of a {}.
a close-up photo of the {}.	a black and white photo of a {}.
a photo of many {}.
itap of my {}.
a bright photo of the {}.
itap of a {}.
a good photo of a {}.
80 text prompt templates from CLIP and FLYP for DomainNet and iWildCam		14 text prompt templates from FLYP for FMoW	56 text prompt templates for Camelyon17
itap of a {}.',		"satellite photo of a {}.",	'a bad photo of a {}.',
'a bad photo of a {}.',		"aerial photo of a {}.",	'a photo of many {}.',
'a photo of many {}.',		"satellite photo of a {} in asia.",	'a photo of the hard to see {}.',
'a sculpture of a {}.',		"aerial photo of a {} in asia.",	'a low resolution photo of the {}.',
'a photo of the hard to see {}.',		"satellite photo of a {} in africa.",	'a bad photo of the {}.',
'a low resolution photo of the {}.',		"aerial photo of a {} in africa.",	'a cropped photo of the {}.',
'a rendering of a {}.',		"satellite photo of a {} in the americas.",	'a photo of a hard to see {}.',
'graffiti of a {}.',		"aerial photo of a {} in the americas.",	'a bright photo of a {}.',
'a bad photo of the {}.',		"satellite photo of a {} in europe.",	'a dark photo of the {}.',
'a cropped photo of the {}.',		"aerial photo of a {} in europe.",	'a drawing of a {}.',
'a tattoo of a {}.',		"satellite photo of a {} in oceania.",	'a photo of my {}.',
'the embroidered {}.',		"aerial photo of a {} in oceania.",	'a close-up photo of a {}.',
'a photo of a hard to see {}.',		"a photo of a {}."	'a black and white photo of the {}.',
'a bright photo of a {}.',		"{}."	'a pixelated photo of the {}.',
'a photo of a clean {}.',			'a bright photo of the {}.',
'a photo of a dirty {}.',			'a cropped photo of a {}.',
'a dark photo of the {}.',			'a jpeg corrupted photo of a {}.',
'a drawing of a {}.',			'a blurry photo of the {}.',
'a photo of my {}.',			'a photo of the {}.',
'the plastic {}.',			'a good photo of the {}.',
'a photo of the cool {}.',			'a rendering of the {}.',
'a close-up photo of a {}.',			'a {} in a video game.',
'a black and white photo of the {}.',			'a close-up photo of the {}.',
'a painting of the {}.',			'a photo of a {}.',
'a painting of a {}.',			'the {} in a video game.',
'a pixelated photo of the {}.',			'a sketch of a {}.',
'a sculpture of the {}.',			'a low resolution photo of a {}.',
'a bright photo of the {}.',			'a photo of the clean {}.',
'a cropped photo of a {}.',			'a photo of a large {}.',
'a plastic {}.',			'a photo of a nice {}.',
'a photo of the dirty {}.',			'a photo of a weird {}.',
'a jpeg corrupted photo of a {}.',			'a blurry photo of a {}.',
'a blurry photo of the {}.',			'itap of the {}.',
'a photo of the {}.',			'a jpeg corrupted photo of the {}.',
'a good photo of the {}.',			'a good photo of a {}.',
'a rendering of the {}.',			'a photo of the nice {}.',
'a {} in a video game.',			'a photo of the small {}.',
'a photo of one {}.',			'a photo of the weird {}.',
'a doodle of a {}.',			'a drawing of the {}.',
'a close-up photo of the {}.',			'a photo of the large {}.',
'a photo of a {}.',			'a black and white photo of a {}.',
'the origami {}.',			'a dark photo of a {}.',
'the {} in a video game.',			'itap of my {}.',
'a sketch of a {}.',			'a photo of a cool {}.',
'a doodle of the {}.',			'a photo of a small {}.',
'a origami {}.',			"A histopathology slide of {}.",
'a low resolution photo of a {}.',			"A microscopic view of {}.",
'the toy {}.',			"A slide image depicting {}.",
'a rendition of the {}.',			"An image depicting {}.",
'a photo of the clean {}.',			"A detailed scan showing {}.",
'a photo of a large {}.',			"A slide image highlighting {}.",
'a rendition of a {}.',			"A histological specimen of {}.",
'a photo of a nice {}.',			"A slide capture of {}.",
'a photo of a weird {}.',			"A digital image representing {}.",
'a blurry photo of a {}.',			"A microscopic examination of {}.",
'a cartoon {}.',			"An image focusing on {}.",
'art of a {}.',
'a sketch of the {}.',
'a embroidered {}.',
'a pixelated photo of a {}.',
'itap of the {}.',
'a jpeg corrupted photo of the {}.',
'a good photo of a {}.',
'a plushie {}.',
'a photo of the nice {}.',
'a photo of the small {}.',
'a photo of the weird {}.',
'the cartoon {}.',
'art of the {}.',
'a drawing of the {}.',
'a photo of the large {}.',
'a black and white photo of a {}.',
'the plushie {}.',
'a dark photo of a {}.',
'graffiti of the {}.',
'a toy {}.',
'itap of my {}.',
'a photo of a cool {}.',
'a photo of a small {}.',
'a tattoo of the {}.',
